# Supplementary material for: Does Multitasking Improve Performance? Evidence from the Emergency Department
Source: Atypon-hosted journal article supplement (doi:10.1287/msom.2013.0464), 2013-11-27
Supplement: msom.2013.0464-sm.zip [file Online_Supplement_MDC_Description_File.pdf › Online_Supplement_MDC_Description_File.pdf]

## MDC Description File

This file gives the MDC number and a narrative description of the MDC for the Prospective Payment System (PPS).

| Field                                                                      | Positions | Description            |
|----------------------------------------------------------------------------|-----------|------------------------|
| 1. MDC                                                                     | 1 - 2     | Numeric MDC Number.    |
| 2. MDC Description                                                         | 4 - 80    | Description of the MDC |
| 01,DISEASES & DISORDERS OF THE NERVOUS SYSTEM                              |           |                        |
| 02,DISEASES & DISORDERS OF THE EYE                                         |           |                        |
| 03,DISEASES & DISORDERS OF THE EAR, NOSE, MOUTH & THROAT                   |           |                        |
| 04,DISEASES & DISORDERS OF THE RESPIRATORY SYSTEM                          |           |                        |
| 05,DISEASES & DISORDERS OF THE CIRCULATORY SYSTEM                          |           |                        |
| 06,DISEASES & DISORDERS OF THE DIGESTIVE SYSTEM                            |           |                        |
| 07,DISEASES & DISORDERS OF THE HEPATOBILIARY SYSTEM & PANCREAS             |           |                        |
| 08,DISEASES & DISORDERS OF THE MUSCULOSKELETAL SYSTEM & CONN TISSUE        |           |                        |
| 09,DISEASES & DISORDERS OF THE SKIN, SUBCUTANEOUS TISSUE & BREAST          |           |                        |
| 10,ENDOCRINE, NUTRITIONAL & METABOLIC DISEASES & DISORDERS                 |           |                        |
| 11,DISEASES & DISORDERS OF THE KIDNEY & URINARY TRACT                      |           |                        |
| 12,DISEASES & DISORDERS OF THE MALE REPRODUCTIVE SYSTEM                    |           |                        |
| 13,DISEASES & DISORDERS OF THE FEMALE REPRODUCTIVE SYSTEM                  |           |                        |
| 14,PREGNANCY, CHILDBIRTH & THE PUERPERIUM                                  |           |                        |
| 15,NEWBORNS & OTHER NEONATES WITH CONDTN ORIG IN PERINATAL PERIOD          |           |                        |
| 16,DISEASES & DISORDERS OF BLOOD, BLOOD FORMING ORGANS, IMMUNOLOG DISORD   |           |                        |
| 17,MYELOPROLIFERATIVE DISEASES & DISORDERS, POORLY DIFFERENTIATED NEOPLASM |           |                        |
| 18,INFECTIOUS & PARASITIC DISEASES, SYSTEMIC OR UNSPECIFIED SITES          |           |                        |
| 19,MENTAL DISEASES & DISORDERS                                             |           |                        |
| 20,ALCOHOL/DRUG USE & ALCOHOL/DRUG INDUCED ORGANIC MENTAL DISORDERS        |           |                        |
| 21,INJURIES, POISONINGS & TOXIC EFFECTS OF DRUGS                           |           |                        |
| 22,BURNS                                                                   |           |                        |
| 23,FACTORS INFLUENCING HLTH STAT & OTHR CONTACTS WITH HLTH SERVCS          |           |                        |
| 24,MULTIPLE SIGNIFICANT TRAUMA                                             |           |                        |
| 25,HUMAN IMMUNODEFICIENCY VIRUS INFECTIONS                                 |           |                        |

□
