# Supplementary material for: Does Multitasking Improve Performance? Evidence from the Emergency Department
Source: Atypon-hosted journal article supplement (doi:10.1287/msom.2013.0464), 2013-11-27
Supplement: msom.2013.0464-sm.zip [file OnlineSupplement_Empirics.pdf › OnlineSupplement_Empirics.pdf]

## Online Supplement

Table A-1  
Relationship between Multi-Tasking and Patient Severity

|                              | Estimate     | Odds Ratio |
|------------------------------|--------------|------------|
| Physician Fixed Effect       | Yes          | Yes        |
| Day of Week                  | Yes          | Yes        |
| Month                        | Yes          | Yes        |
| System Load                  | Yes          | Yes        |
| Physician Multitasking       | 0.00 (0.305) | 1.00       |
| Wald Chi-Square (Pr > ChiSq) | < 0.0001     | < 0.0001   |

N = 145935 Patients

Table A-2  
Correlation Table for Busy Period Duration, Revisits, Diagnoses

|                      | (1)   | (2)   | (3)   | (4)   | (5)   | (6)   | (7)   | (8)   | (9) |
|----------------------|-------|-------|-------|-------|-------|-------|-------|-------|-----|
| 1. Revisits          | 1     |       |       |       |       |       |       |       |     |
| 2. Diagnoses         | 0.292 | 1     |       |       |       |       |       |       |     |
| 3. Busy Period       | 0.221 | 0.727 | 1     |       |       |       |       |       |     |
| 4. No. of Patients   | 0.334 | 0.794 | 0.451 | 1     |       |       |       |       |     |
| 5. Triage Severity   | 0.119 | 0.561 | 0.676 | 0.235 | 1     |       |       |       |     |
| 6. Multitasking      | 0.275 | 0.814 | 0.648 | 0.758 | 0.511 | 1     |       |       |     |
| 7. Adj. System Load  | 0.053 | 0.185 | 0.082 | 0.249 | 0.028 | 0.256 | 1     |       |     |
| 8. RVU               | 0.292 | 0.757 | 0.557 | 0.829 | 0.367 | 0.727 | 0.205 | 1     |     |
| 9. Types of Patients | 0.299 | 0.804 | 0.657 | 0.772 | 0.492 | 0.879 | 0.213 | 0.755 | 1   |

All estimates are statistically significant at  $p < 0.001$
